# Supplementary material
Source: PubMed Central journal article supplement (PMC2276385)

---

Fig. 5. Supplemental material Confocal fluorescence microscopy of *T. cruzi* metacyclic trypomastigotes. **(a-d)** and *in vitro* differentiated amastigotes **(e-h)**. Differential interference contrast (DIC) images **(a,e)**; anti-TcPUF6 (1/100) **(b,f)**; DAPI images **(c,g)**; superimposition of anti-TcPUF6 and DAPI **(d,h)**.

Fig. 6. Supplemental material. Confocal fluorescence microscopy of *T. cruzi* log-phase epimastigotes. **(a,b)** Nomarski differential interference contrast (DIC) images; **(c,d)** anti-TcPUF6; **e**: anti-ribosomal protein P; **(f)** anti-Ptr1; **(g)** superimposition of anti-TcPUF6 (green) and anti-ribosomal protein P (red); **(h)** superimposition of anti-TcPUF6 (green) and anti-Ptr1 (red). DAPI images (blue). Magnification bars = 5  $\mu$ m.

Fig. 7. Supplemental material. Scatterplot showing the technical **(a)** and biological **(b)** reproducibility of the microarray data derived from the transfectant. **(a)** Comparison of two slides hybridized with control and TcPUF6-pTEX in a dye swap design; **(b)** comparison of two different sets of control and TcPUF6-pTEX (data from the replicated hybridizations were averaged). No filter was applied and all probe data are shown

Fig. 8. Supplemental material. Scatterplot showing the reproducibility of selected probes from the transfectant mRNA analysis. Axis values are log<sub>2</sub>(FC) from experiment A (X-axis) and experiment B (Y-axis).

Figure 5

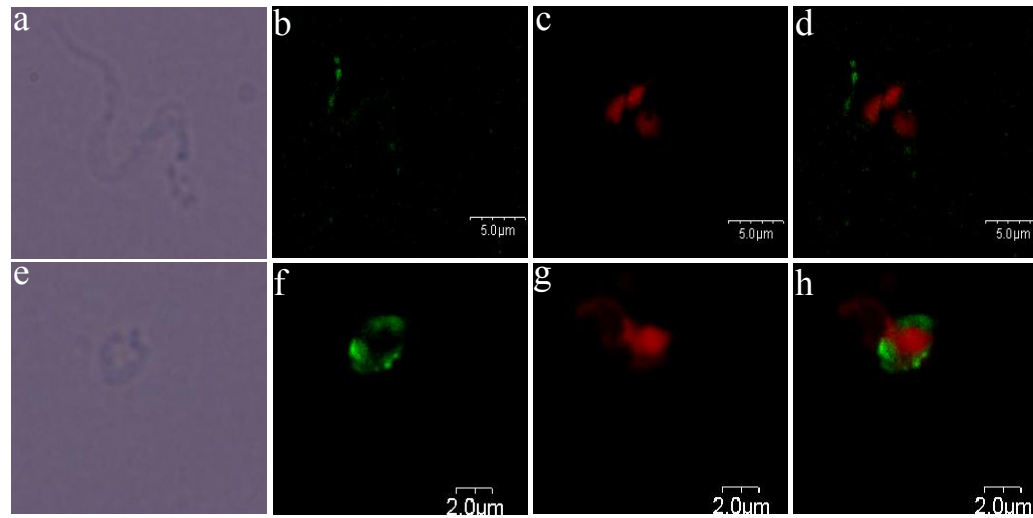

Figure 6

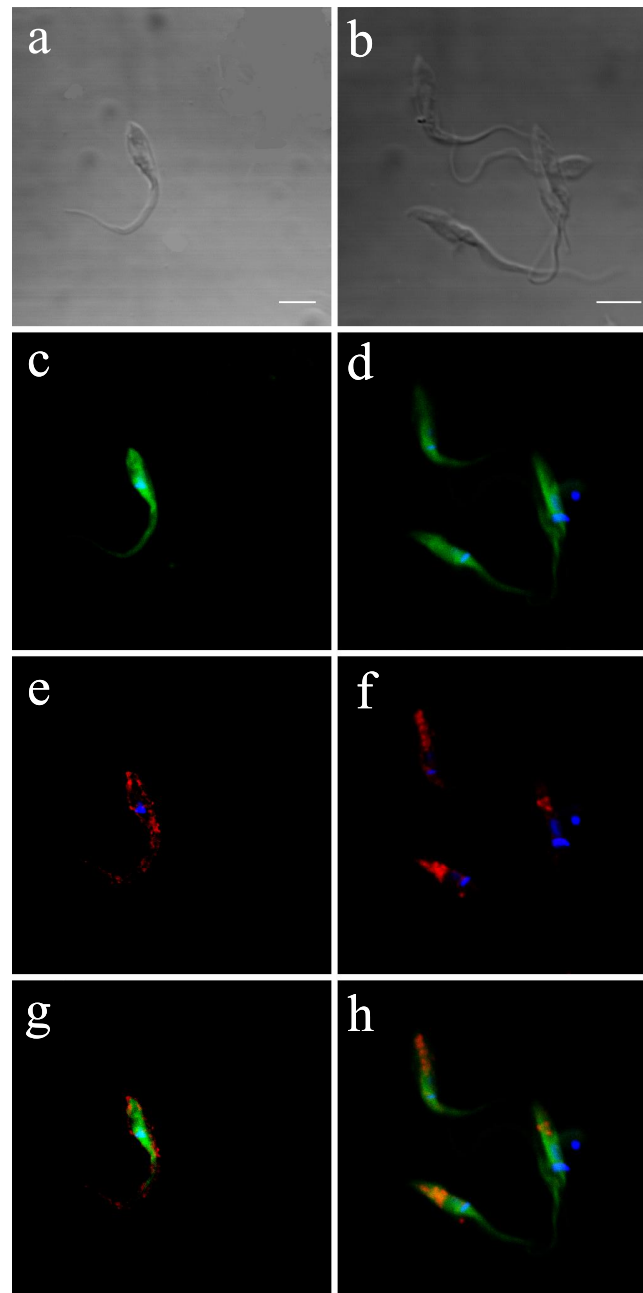

Figure 7

a

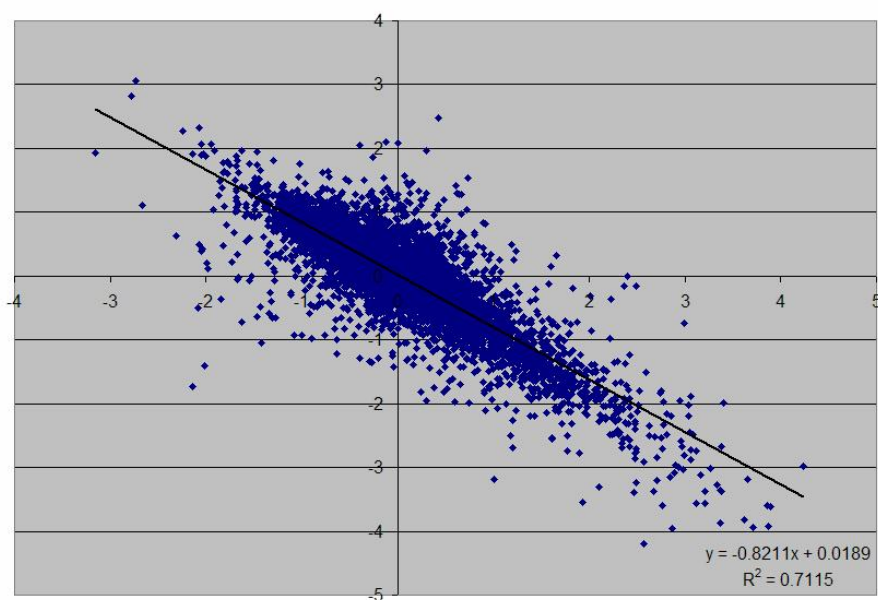

b

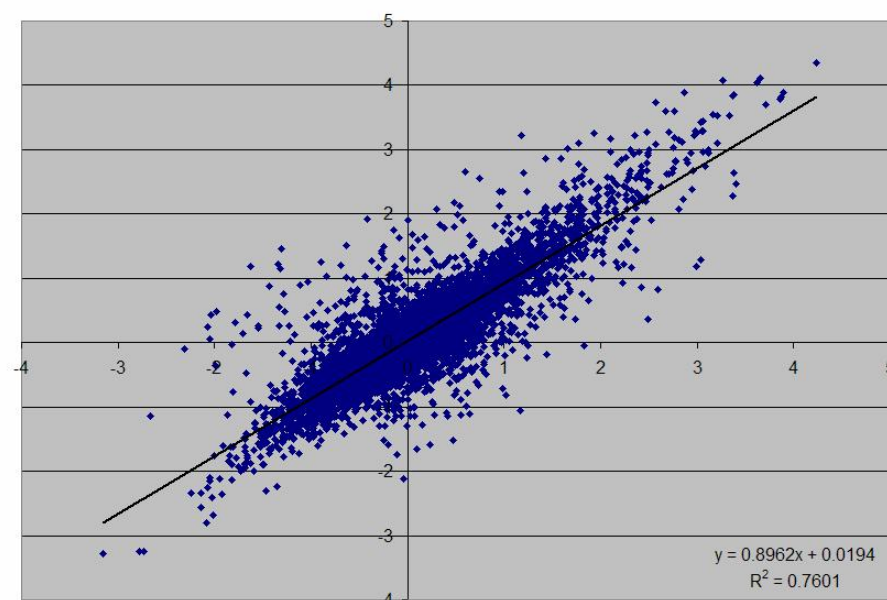

Figure 8

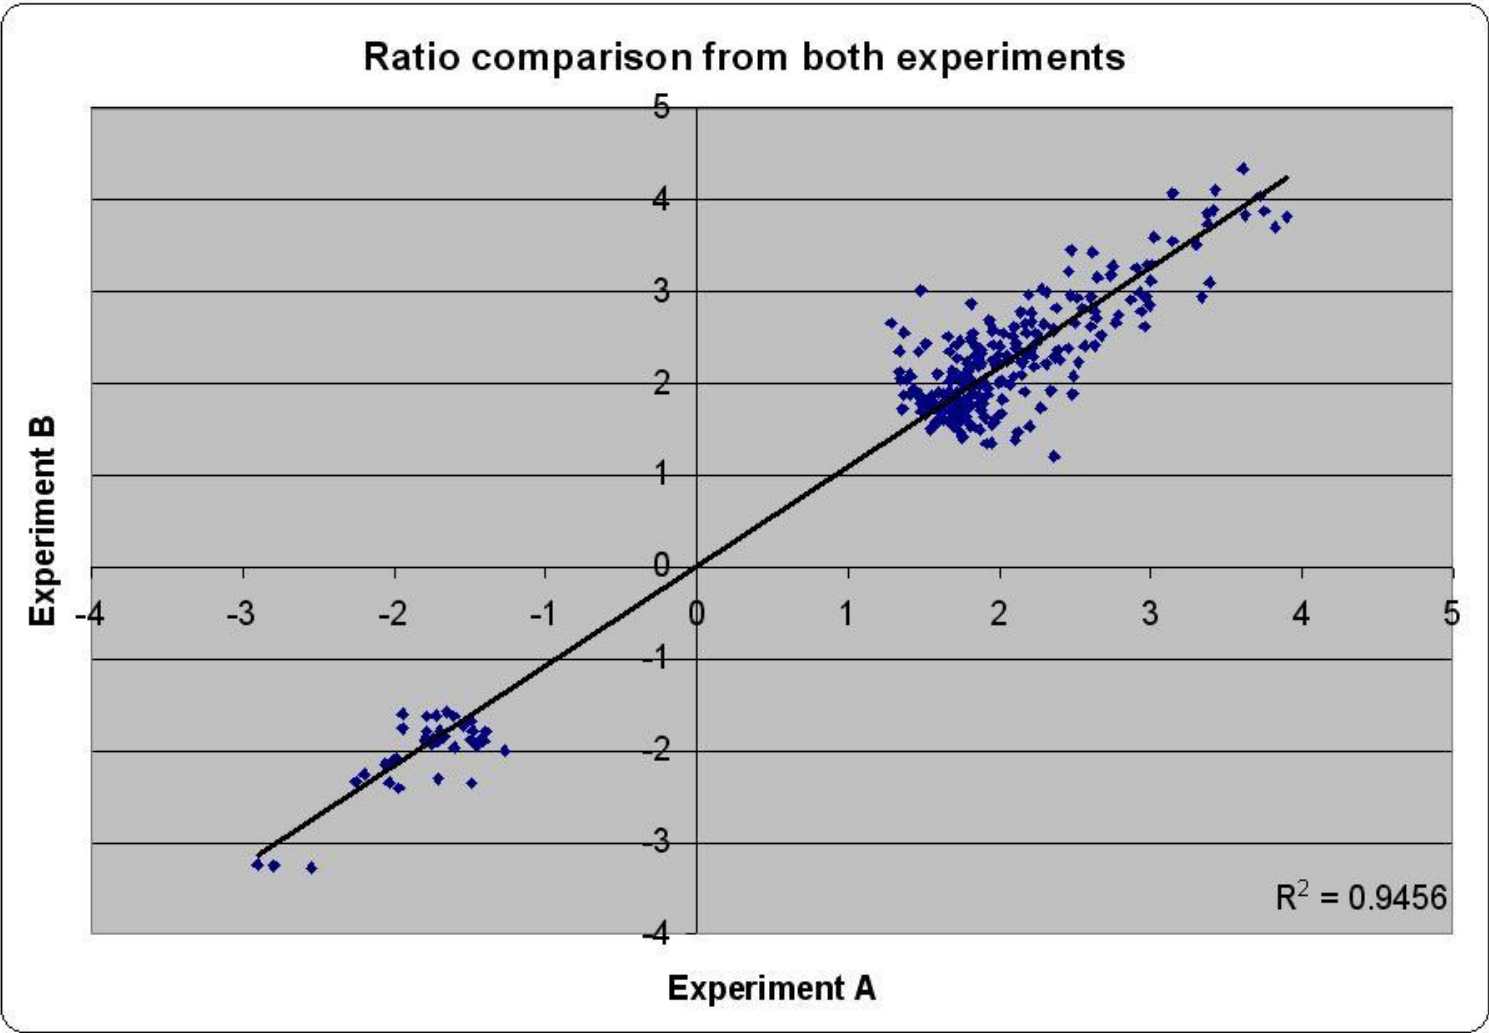

Supplement: jbc_M703097200_1.pdf [file jbc_M703097200_1.pdf]
