# Supplementary material
Source: PubMed Central journal article supplement (PMC2276385)
Supplement: jbc_M703097200_2.pdf [file jbc_M703097200_2.pdf]

Table 2a. Increased genes in the transfectant mRNA analysis

| Probe Name    | log2(FC) | Gene annotation                                                                                                                   | GeneID TSK#            |
|---------------|----------|-----------------------------------------------------------------------------------------------------------------------------------|------------------------|
| CTG_2462      | 2.962    | 3,2-trans-enoyl-CoA isomerase, mitochondrial precursor, putative                                                                  | Tc00.1047053510645.30  |
| IB_MT_02_F08  | 1.719    | 40S ribosomal protein S11, putative                                                                                               | Tc00.1047053508405.40  |
| MG_ST_15_C06  | 1.911    | 60S ribosomal protein L10a, putative                                                                                              | Tc00.1047053511277.160 |
| MG_24H_15_D04 | 1.907    | 60S ribosomal protein L10a, putative                                                                                              | Tc00.1047053511277.160 |
| CTG_1494      | 2.465    | 60S ribosomal protein L4, putative                                                                                                | Tc00.1047053504121.30  |
| CTG_1223      | 1.649    | AAA ATPase, putative                                                                                                              | Tc00.1047053509437.50  |
| MG_24H_07_B07 | 1.622    | ABC transporter, putative                                                                                                         | Tc00.1047053506579.10  |
| CTG_2431      | 2.262    | actin, putative                                                                                                                   | Tc00.1047053510127.79  |
| CTG_307       | 1.679    | acyl carrier protein, mitochondrial precursor, putative                                                                           | Tc00.1047053511867.140 |
| CTG_4081      | 3.083    | alcohol dehydrogenase, putative                                                                                                   | Tc00.1047053506357.50  |
| CTG_882       | 3.133    | alpha tubulin, putative                                                                                                           | Tc00.1047053411235.9   |
| MG_ST_08_B01  | 3.308    | amino acid permease, putative                                                                                                     | Tc00.1047053511325.40  |
| IB_ST_02_H05  | 3.412    | amino acid transporter, putative                                                                                                  | Tc00.1047053506053.10  |
| MG_ST_08_H12  | 3.769    | amino acid transporter, putative                                                                                                  | Tc00.1047053506053.10  |
| CTG_3460      | 2.712    | amino acid transporter, putative                                                                                                  | Tc00.1047053507659.20  |
| IB_MT_01_F06  | 2.151    | amino acid transporter, putative                                                                                                  | Tc00.1047053507659.20  |
| MG_EP_02_D10  | 1.911    | amino acid transporter, putative                                                                                                  | Tc00.1047053507659.20  |
| CTG_1747      | 1.833    | amino acid transporter, putative                                                                                                  | Tc00.1047053508017.30  |
| IB_ST_01_H05  | 3.347    | arginine kinase ATP-guanidine phosphotransferase                                                                                  | Tc00.1047053507241.30  |
| CTG_1307      | 2.207    | arginine kinase ATP-guanidine phosphotransferase                                                                                  | Tc00.1047053507241.30  |
| MG_ST_10_H03  | 2.055    | arginine kinase ATP-guanidine phosphotransferase                                                                                  | Tc00.1047053507241.30  |
| CTG_1860      | 1.693    | aspartate carbamoyltransferase, putative                                                                                          | Tc00.1047053511643.30  |
| CTG_1856      | 1.898    | ATP synthase, alpha chain, mitochondrial precursor, putative                                                                      | Tc00.1047053510395.10  |
| IB_EP_16_E06  | 2.258    | ATPase beta subunit, putative                                                                                                     | Tc00.1047053509233.180 |
| MG_ST_05_D07  | 1.650    | ATPase beta subunit, putative                                                                                                     | Tc00.1047053509233.180 |
| CTG_3358      | 2.189    | axoneme central apparatus protein, putative                                                                                       | Tc00.1047053510955.40  |
| MG_ST_08_G04  | 3.814    | AY526247   Trypanosoma cruzi putative amino acid transporter PAT6 gene                                                            | AY526247               |
| CTG_586       | 2.036    | beta tubulin, putative                                                                                                            | Tc00.1047053506563.40  |
| CTG_1464      | 2.357    | calpain-like cysteine peptidase (pseudogene), putative calpain-like cysteine peptidase, clan CA, family C2, putative (pseudogene) | Tc00.1047053508999.250 |
| IB_ST_20_G08  | 2.459    | calpain-like cysteine peptidase, putative calpain-like cysteine peptidase, clan CA, family C2, putative                           | Tc00.1047053509003.40  |
| CTG_3451      | 1.758    | calpain-like cysteine peptidase, putative cysteine peptidase, Clan CA, family C2, putative                                        | Tc00.1047053508999.200 |
| IB_MT_02_B11  | 1.843    | casein kinase, putative                                                                                                           | Tc00.1047053508541.240 |
| CTG_2698      | 1.667    | centrin, putative                                                                                                                 | Tc00.1047053506559.380 |
| MG_EP_08_D11  | 1.898    | chaperone DnaJ protein, putative                                                                                                  | Tc00.1047053510575.200 |
| CTG_3832      | 2.191    | chaperonin containing T-complex protein, putative                                                                                 | Tc00.1047053511725.250 |
| MG_24H_11_G01 | 2.035    | chaperonin containing T-complex protein, putative                                                                                 | Tc00.1047053511725.250 |
| CTG_1559      | 1.629    | choline dehydrogenase, putative                                                                                                   | Tc00.1047053511141.20  |
| CTG_3050      | 1.596    | clathrin heavy chain, putative                                                                                                    | Tc00.1047053506167.50  |
| CTG_1907      | 2.184    | cyclosome subunit, putative                                                                                                       | Tc00.1047053511507.30  |

|               |       |                                                                                                                                |                        |
|---------------|-------|--------------------------------------------------------------------------------------------------------------------------------|------------------------|
| MG_EP_06_G01  | 1.848 | cystathionine beta-synthase cysteine synthase serine sulfhydrylase                                                             | Tc00.1047053511691.20  |
| CTG_1937      | 1.924 | cysteine proteinase, putative                                                                                                  | Tc00.1047053507849.50  |
| MG_EP_08_C09  | 2.774 | cytochrome C oxidase subunit IV, putative                                                                                      | Tc00.1047053506529.360 |
| CTG_1074      | 1.621 | cytochrome c oxidase VIII (COX VIII), putative                                                                                 | Tc00.1047053407477.50  |
| MG_24H_11_A10 | 1.791 | cytoskeleton-associated protein CAP5.5, putative cysteine peptidase, Clan CA, family C2, putative                              | Tc00.1047053508555.60  |
| CTG_2371      | 1.746 | delta-6 fatty acid desaturase, putative                                                                                        | Tc00.1047053507609.40  |
| MG_ST_11_D04  | 2.008 | delta-6 fatty acid desaturase, putative                                                                                        | Tc00.1047053507609.40  |
| CTG_281       | 1.687 | dihydrofolate reductase-thymidylate synthase, putative                                                                         | Tc00.1047053509153.90  |
| MG_EP_08_E07  | 3.152 | dipeptidyl-peptidase, putative                                                                                                 | Tc00.1047053508699.120 |
| MG_ST_06_H09  | 2.613 | D-isomer specific 2-hydroxyacid dehydrogenase-protein, putative                                                                | Tc00.1047053510099.120 |
| IB_EP_11_B08  | 1.733 | D-isomer specific 2-hydroxyacid dehydrogenase-protein, putative                                                                | Tc00.1047053510099.120 |
| CTG_1150      | 2.922 | dispersed gene family protein 1 (DGF-1), putative                                                                              | Tc00.1047053507035.30  |
| IB_ST_02_B11  | 1.709 | DNA repair protein RAD51, putative                                                                                             | Tc00.1047053503801.30  |
| IB_MT_07_E07  | 2.004 | DnaJ chaperone protein, putative                                                                                               | Tc00.1047053509629.20  |
| CTG_3315      | 2.364 | DREV methyltransferase, putative                                                                                               | Tc00.1047053509965.190 |
| CTG_1422      | 1.869 | elongation factor 1-gamma (EF-1-gamma), putative                                                                               | Tc00.1047053510463.160 |
| CTG_673       | 2.492 | elongation factor 2, putative                                                                                                  | Tc00.1047053508169.20  |
| CTG_2383      | 2.378 | enolase, putative                                                                                                              | Tc00.1047053504105.140 |
| IB_MT_19_E01  | 1.668 | enolase, putative                                                                                                              | Tc00.1047053504105.140 |
| CTG_3581      | 1.622 | expression site-associated gene (ESAG-like) protein, putative expression site-associated gene 5 (ESAG5-like) protein, putative | Tc00.1047053508257.220 |
| MG_24H_18_F02 | 1.778 | flagellar radial spoke protein-like, putative                                                                                  | Tc00.1047053510149.120 |
| CTG_140       | 1.864 | folate/pteridine transporter, putative                                                                                         | Tc00.1047053508027.40  |
| MG_R_Y_#20    | 2.599 | glucose-regulated protein 78, putative                                                                                         | Tc00.1047053506585.40  |
| CTG_1650      | 2.683 | glutamamyl carboxypeptidase, putative metallo-peptidase, clan MH, family M18, putative                                         | Tc00.1047053511391.120 |
| MG_EP_02_D05  | 2.127 | glutamamyl carboxypeptidase, putative metallo-peptidase, clan MH, family M18, putative                                         | Tc00.1047053511391.120 |
| IB_EP_11_H06  | 1.691 | glutamate dehydrogenase, putative                                                                                              | Tc00.1047053508111.30  |
| CTG_1213      | 2.379 | glyceraldehyde 3-phosphate dehydrogenase, putative                                                                             | Tc00.1047053509065.70  |
| MG_ST_05_F11  | 2.070 | glycosomal malate dehydrogenase, putative                                                                                      | Tc00.1047053506503.69  |
| CTG_1653      | 1.866 | glycosomal membrane protein, putative                                                                                          | Tc00.1047053509203.40  |
| CTG_650       | 1.612 | Golgi/lysosome glycoprotein, putative                                                                                          | Tc00.1047053511391.180 |
| CTG_274       | 2.717 | heat shock protein 70 (HSP70), putative                                                                                        | Tc00.1047053511211.170 |
| IB_EP_12_D11  | 2.374 | hexokinase, putative                                                                                                           | Tc00.1047053508951.20  |
| CTG_1787      | 2.118 | hexokinase, putative                                                                                                           | Tc00.1047053508951.20  |
| IB_EP_16_C04  | 3.652 | hexose transporter, putative                                                                                                   | Tc00.1047053506355.10  |
| IB_EP_14_D04  | 2.960 | hexose transporter, putative                                                                                                   | Tc00.1047053506355.10  |
| CTG_663       | 1.711 | hexose transporter, putative                                                                                                   | Tc00.1047053506355.10  |
| CTG_97        | 3.413 | histone H3, putative                                                                                                           | Tc00.1047053509471.86  |
| CTG_410       | 2.583 | hypothetical protein                                                                                                           | Tc00.1047053504985.10  |
| MG_ST_14_D07  | 2.028 | hypothetical protein                                                                                                           | Tc00.1047053506295.150 |
| IB_MT_02_F11  | 1.850 | hypothetical protein                                                                                                           | Tc00.1047053506835.50  |
| MG_24H_11_B12 | 2.344 | hypothetical protein                                                                                                           | Tc00.1047053508177.70  |
| MG_EP_09_A05  | 1.683 | hypothetical protein                                                                                                           | Tc00.1047053509429.280 |

|               |       |                                 |                        |
|---------------|-------|---------------------------------|------------------------|
| MG_EP_03_E01  | 1.747 | hypothetical protein            | Tc00.1047053511001.40  |
| MG_24H_09_A03 | 1.813 | hypothetical protein            | Tc00.1047053511439.40  |
| CTG_2713      | 1.889 | hypothetical protein            | Tc00.1047053511439.40  |
| MG_ST_05_C08  | 2.096 | hypothetical protein            | Tc00.1047053511807.220 |
| CTG_3256      | 3.975 | hypothetical protein, conserved | Tc00.1047053503565.29  |
| IB_MT_04_D02  | 2.107 | hypothetical protein, conserved | Tc00.1047053504137.90  |
| CTG_175       | 3.608 | hypothetical protein, conserved | Tc00.1047053504153.70  |
| IB_ST_01_A04  | 1.956 | hypothetical protein, conserved | Tc00.1047053504153.70  |
| IB_EP_16_F07  | 2.477 | hypothetical protein, conserved | Tc00.1047053505789.20  |
| IB_MT_04_A01  | 2.118 | hypothetical protein, conserved | Tc00.1047053506147.110 |
| CTG_1667      | 3.859 | hypothetical protein, conserved | Tc00.1047053506147.190 |
| CTG_4002      | 2.677 | hypothetical protein, conserved | Tc00.1047053506175.110 |
| IB_EP_16_C05  | 1.812 | hypothetical protein, conserved | Tc00.1047053506175.110 |
| CTG_292       | 2.409 | hypothetical protein, conserved | Tc00.1047053506195.290 |
| MG_ST_16_G12  | 1.699 | hypothetical protein, conserved | Tc00.1047053506195.290 |
| CTG_3175      | 1.670 | hypothetical protein, conserved | Tc00.1047053506235.20  |
| CTG_3328      | 2.067 | hypothetical protein, conserved | Tc00.1047053506321.280 |
| CTG_2266      | 2.107 | hypothetical protein, conserved | Tc00.1047053506351.20  |
| CTG_2277      | 2.086 | hypothetical protein, conserved | Tc00.1047053506355.130 |
| CTG_793       | 2.000 | hypothetical protein, conserved | Tc00.1047053506399.60  |
| CTG_4463      | 1.697 | hypothetical protein, conserved | Tc00.1047053506407.50  |
| CTG_4382      | 3.882 | hypothetical protein, conserved | Tc00.1047053506469.100 |
| CTG_4324      | 1.746 | hypothetical protein, conserved | Tc00.1047053506513.120 |
| MG_ST_16_H04  | 1.814 | hypothetical protein, conserved | Tc00.1047053506529.330 |
| MG_24H_11_G07 | 1.844 | hypothetical protein, conserved | Tc00.1047053506629.200 |
| CTG_4527      | 3.615 | hypothetical protein, conserved | Tc00.1047053506681.50  |
| CTG_3580      | 1.792 | hypothetical protein, conserved | Tc00.1047053506725.20  |
| MG_ST_11_C01  | 2.146 | hypothetical protein, conserved | Tc00.1047053506789.340 |
| MG_24H_03_D04 | 1.619 | hypothetical protein, conserved | Tc00.1047053506789.340 |
| CTG_404       | 1.937 | hypothetical protein, conserved | Tc00.1047053506853.10  |
| MG_24H_10_D11 | 1.528 | hypothetical protein, conserved | Tc00.1047053506945.50  |
| MG_24H_16_F08 | 2.303 | hypothetical protein, conserved | Tc00.1047053507807.10  |
| CTG_3897      | 1.587 | hypothetical protein, conserved | Tc00.1047053507907.50  |
| CTG_2229      | 3.245 | hypothetical protein, conserved | Tc00.1047053507951.15  |
| CTG_4177      | 1.678 | hypothetical protein, conserved | Tc00.1047053508173.129 |
| CTG_4383      | 2.038 | hypothetical protein, conserved | Tc00.1047053508177.40  |
| MG_24H_09_C08 | 1.746 | hypothetical protein, conserved | Tc00.1047053508177.40  |
| CTG_1889      | 2.926 | hypothetical protein, conserved | Tc00.1047053508177.90  |
| CTG_2413      | 2.863 | hypothetical protein, conserved | Tc00.1047053508177.90  |
| MG_24H_02_F02 | 1.937 | hypothetical protein, conserved | Tc00.1047053508177.90  |
| CTG_1889      | 1.956 | hypothetical protein, conserved | Tc00.1047053508177.90  |
| MG_24H_07_H05 | 1.960 | hypothetical protein, conserved | Tc00.1047053508177.90  |

|               |       |                                                                                      |                        |
|---------------|-------|--------------------------------------------------------------------------------------|------------------------|
| IB_EP_15_F06  | 1.634 | hypothetical protein, conserved                                                      | Tc00.1047053508277.40  |
| CTG_1825      | 2.248 | hypothetical protein, conserved                                                      | Tc00.1047053508355.330 |
| CTG_3880      | 1.714 | hypothetical protein, conserved                                                      | Tc00.1047053508569.90  |
| MG_EP_06_E05  | 2.278 | hypothetical protein, conserved                                                      | Tc00.1047053508693.50  |
| CTG_1252      | 2.101 | hypothetical protein, conserved                                                      | Tc00.1047053508693.50  |
| MG_EP_03_B03  | 1.652 | hypothetical protein, conserved                                                      | Tc00.1047053508799.10  |
| MG_ST_14_E05  | 2.445 | hypothetical protein, conserved                                                      | Tc00.1047053508799.270 |
| CTG_2394      | 2.891 | hypothetical protein, conserved                                                      | Tc00.1047053509033.50  |
| CTG_3340      | 1.914 | hypothetical protein, conserved                                                      | Tc00.1047053509207.40  |
| MG_EP_08_B02  | 1.622 | hypothetical protein, conserved                                                      | Tc00.1047053509669.70  |
| MG_ST_14_H05  | 1.927 | hypothetical protein, conserved                                                      | Tc00.1047053509713.20  |
| MG_ST_08_B06  | 2.957 | hypothetical protein, conserved                                                      | Tc00.1047053509713.30  |
| IB_ST_17_B07  | 2.902 | hypothetical protein, conserved                                                      | Tc00.1047053509713.30  |
| CTG_3073      | 1.905 | hypothetical protein, conserved                                                      | Tc00.1047053509713.30  |
| MG_ST_14_C06  | 1.698 | hypothetical protein, conserved                                                      | Tc00.1047053509713.30  |
| MG_24H_15_C12 | 1.795 | hypothetical protein, conserved                                                      | Tc00.1047053509761.10  |
| CTG_4323      | 2.193 | hypothetical protein, conserved                                                      | Tc00.1047053509837.10  |
| IB_MT_19_C09  | 2.581 | hypothetical protein, conserved                                                      | Tc00.1047053509859.30  |
| CTG_1527      | 2.083 | hypothetical protein, conserved                                                      | Tc00.1047053509935.20  |
| IB_EP_16_A07  | 2.132 | hypothetical protein, conserved                                                      | Tc00.1047053509939.19  |
| MG_EP_09_H05  | 1.647 | hypothetical protein, conserved                                                      | Tc00.1047053510087.80  |
| MG_24H_08_A03 | 1.734 | hypothetical protein, conserved                                                      | Tc00.1047053510101.470 |
| CTG_2738      | 1.676 | hypothetical protein, conserved                                                      | Tc00.1047053510307.200 |
| IB_MT_08_G04  | 1.779 | hypothetical protein, conserved                                                      | Tc00.1047053510349.64  |
| CTG_3310      | 2.285 | hypothetical protein, conserved                                                      | Tc00.1047053510407.30  |
| CTG_1542      | 1.662 | hypothetical protein, conserved                                                      | Tc00.1047053510535.64  |
| IB_MT_08_E06  | 1.710 | hypothetical protein, conserved                                                      | Tc00.1047053510595.40  |
| MG_24H_09_B03 | 1.675 | hypothetical protein, conserved                                                      | Tc00.1047053510797.30  |
| MG_EP_10_B11  | 1.972 | hypothetical protein, conserved                                                      | Tc00.1047053510947.30  |
| CTG_2748      | 2.028 | hypothetical protein, conserved                                                      | Tc00.1047053511003.90  |
| MG_ST_08_F06  | 3.023 | hypothetical protein, conserved                                                      | Tc00.1047053511053.10  |
| MG_24H_09_F03 | 1.626 | hypothetical protein, conserved                                                      | Tc00.1047053511245.230 |
| IB_ST_20_A03  | 1.906 | hypothetical protein, conserved                                                      | Tc00.1047053511421.24  |
| CTG_1644      | 1.636 | hypothetical protein, conserved                                                      | Tc00.1047053511523.14  |
| IB_ST_02_H07  | 1.682 | hypothetical protein, conserved                                                      | Tc00.1047053511559.20  |
| MG_ST_06_E06  | 2.275 | hypothetical protein, conserved                                                      | Tc00.1047053511621.244 |
| IB_EP_16_F04  | 1.998 | hypothetical protein, conserved                                                      | Tc00.1047053511903.40  |
| MG_EP_06_D11  | 2.655 | inosine-5'-monophosphate dehydrogenase, putative                                     | Tc00.1047053507211.40  |
| MG_24H_08_E12 | 1.849 | kinesin, putative                                                                    | Tc00.1047053509023.180 |
| CTG_2507      | 2.654 | LA RNA binding protein, putative                                                     | Tc00.1047053511367.60  |
| MG_EP_03_C10  | 2.125 | lanosterol 14-alpha-demethylase, putative                                            | Tc00.1047053510101.50  |
| CTG_4180      | 2.420 | methionine aminopeptidase, putative metallo-peptidase, clan MG, family M24, putative | Tc00.1047053507031.120 |

|               |       |                                                                                                                 |                        |
|---------------|-------|-----------------------------------------------------------------------------------------------------------------|------------------------|
| CTG_2427      | 2.841 | mevalonate kinase, putative                                                                                     | Tc00.1047053436521.9   |
| MG_EP_09_B06  | 1.747 | mitochondrial ATP-dependent zinc metallopeptidase, putative metallo-peptidase, clan MA(E), family M41, putative | Tc00.1047053507739.20  |
| CTG_2768      | 1.692 | mitochondrial carrier protein, putative                                                                         | Tc00.1047053504033.90  |
| MG_EP_05_H03  | 1.650 | mitochondrial processing peptidase alpha subunit, putative metallo-peptidase, Clan ME, Family M16, putative     | Tc00.1047053506735.10  |
| CTG_2473      | 1.771 | mucin TcMUCII, putative                                                                                         | Tc00.1047053508295.30  |
| CTG_2039      | 2.790 | mucin TcMUCII, putative                                                                                         | Tc00.1047053511099.70  |
| CTG_4576      | 2.521 | mucin-associated surface protein (MASP, pseudogene), putative                                                   | Tc00.1047053508521.70  |
| IB_MT_06_B12  | 1.770 | N-acetylglucosamine-6-phosphate deacetylase-like protein, putative                                              | Tc00.1047053506507.10  |
| CTG_665       | 2.768 | NAD(P)-dependent steroid dehydrogenase protein, putative                                                        | Tc00.1047053510873.10  |
| MG_24H_10_G09 | 2.394 | NAD(P)-dependent steroid dehydrogenase protein, putative                                                        | Tc00.1047053510873.10  |
| CTG_2950      | 2.310 | nitrilase, putative                                                                                             | Tc00.1047053509979.150 |
| CTG_851       | 1.799 | nucleobase transporter, putative                                                                                | Tc00.1047053506445.110 |
| Nop58         | 1.782 | nucleolar RNA binding protein, putative                                                                         | Tc00.1047053508277.230 |
| CTG_4492      | 2.325 | nucleoside transporter 1, putative                                                                              | Tc00.1047053508645.40  |
| CTG_148       | 3.558 | orotidine-5-phosphate decarboxylase/orotate phosphoribosyltransferase, putative OMPDCase-OPRTase, putative      | Tc00.1047053507059.60  |
| CTG_1779      | 1.829 | orotidine-5-phosphate decarboxylase/orotate phosphoribosyltransferase, putative OMPDCase-OPRTase, putative      | Tc00.1047053507059.60  |
| CTG_1110      | 2.328 | pantothenate kinase subunit, putative                                                                           | Tc00.1047053511153.120 |
| MG_EP_05_B06  | 3.017 | peptidase M20/M25/M40, putative                                                                                 | Tc00.1047053509213.120 |
| MG_EP_10_B06  | 2.083 | peptidase T, putative aminotripeptidase, putative                                                               | Tc00.1047053506513.110 |
| IB_ST_17_B09  | 2.725 | phosphoglycerate kinase, putative                                                                               | Tc00.1047053505999.90  |
| IB_EP_16_H11  | 1.586 | poly(A)-binding protein, putative polyadenylate-binding protein, putative                                       | Tc00.1047053508461.140 |
| MG_24H_16_B04 | 1.540 | pretranslocation protein, alpha subunit, putative SEC61-like (pretranslocation process) protein, putative       | Tc00.1047053506297.240 |
| IB_MT_07_H07  | 2.187 | prostaglandin F synthase, putative aldo/keto reductase, putative                                                | Tc00.1047053511287.49  |
| CTG_3494      | 2.332 | prostaglandin F2alpha synthase                                                                                  | Tc00.1047053508461.80  |
| CTG_557       | 3.059 | protein kinase, putative                                                                                        | Tc00.1047053506743.160 |
| IB_EP_16_A09  | 2.958 | protein kinase, putative                                                                                        | Tc00.1047053508405.70  |
| MG_ST_09_C06  | 1.753 | protein kinase, putative                                                                                        | Tc00.1047053508405.70  |
| MG_ST_09_F08  | 2.009 | protein kinase, putative                                                                                        | Tc00.1047053508405.70  |
| MG_ST_08_A04  | 2.151 | protein kinase, putative                                                                                        | Tc00.1047053508405.70  |
| MG_24H_07_G04 | 2.116 | protein kinase, putative                                                                                        | Tc00.1047053510943.40  |
| CTG_150       | 2.468 | protein kinase, putative                                                                                        | Tc00.1047053511351.30  |
| CTG_3546      | 2.248 | PUF1, putative                                                                                                  | Tc00.1047053508625.160 |
| CTG_3624      | 1.755 | ribonucleoside-diphosphate reductase small chain, putative                                                      | Tc00.1047053511555.80  |
| MG_24H_03_E06 | 1.586 | ribonucleoside-diphosphate reductase small chain, putative                                                      | Tc00.1047053511555.80  |
| CTG_4212      | 3.732 | RNA-binding protein, putative                                                                                   | Tc00.1047053509317.60  |
| CTG_1441      | 1.589 | S-adenosylmethionine synthetase, putative                                                                       | Tc00.1047053506945.160 |
| MG_24H_20_E05 | 2.022 | serine hydroxymethyltransferase, putative                                                                       | Tc00.1047053510407.90  |
| CTG_3665      | 1.988 | serine/threonine protein kinase, putative                                                                       | Tc00.1047053511277.140 |
| CTG_1728      | 2.599 | succinyl-CoA ligase [GDP-forming] beta-chain, putative                                                          | Tc00.1047053507681.20  |

|              |       |                                                                                   |                        |
|--------------|-------|-----------------------------------------------------------------------------------|------------------------|
| CTG_240      | 2.286 | succinyl-CoA synthetase alpha subunit, putative                                   | Tc00.1047053508479.340 |
| CTG_4424     | 2.263 | succinyl-coA:3-ketoacid-coenzyme A transferase, mitochondrial precursor, putative | Tc00.1047053504153.360 |
| MG_ST_05_H07 | 1.644 | syntaxin, putative                                                                | Tc00.1047053508955.10  |
| IB_MT_08_D07 | 1.586 | t-complex protein 1, delta subunit, putative                                      | Tc00.1047053509695.200 |
| CTG_4504     | 1.728 | transketolase, putative                                                           | Tc00.1047053511903.120 |
| IB_MT_11_A02 | 1.666 | transketolase, putative                                                           | Tc00.1047053511903.120 |
| CTG_1577     | 1.765 | trans-sialidase (pseudogene), putative                                            | Tc00.1047053410923.40  |
| CTG_120      | 3.142 | trans-sialidase (pseudogene), putative                                            | Tc00.1047053422843.10  |
| CTG_2897     | 2.487 | trans-sialidase, putative                                                         | Tc00.1047053508045.120 |
| CTG_1217     | 2.714 | triosephosphate isomerase, putative                                               | Tc00.1047053508647.200 |
| IB_MT_07_E04 | 1.646 | triosephosphate isomerase, putative                                               | Tc00.1047053508647.200 |
| CTG_2486     | 1.710 | tRNA (guanine-N(7)-)-methyltransferase, putative methyltransferase, putative      | Tc00.1047053510429.20  |
| CTG_4105     | 2.265 | trypanothione reductase, putative                                                 | Tc00.1047053503555.30  |
| CTG_1857     | 2.208 | tryparedoxin peroxidase, putative                                                 | Tc00.1047053509499.14  |
| CTG_3669     | 1.755 | tryparedoxin, putative                                                            | Tc00.1047053509997.30  |
| MG_EP_06_D07 | 1.880 | tyrosine aminotransferase, putative                                               | Tc00.1047053510187.20  |
| MG_EP_10_A08 | 1.638 | vesicular-fusion ATPase-like protein, putative                                    | Tc00.1047053509831.20  |
| CTG_1590     | 3.764 | zinc carboxypeptidase, putative                                                   | Tc00.1047053509979.51  |

Probe Name: Internal code for T. cruzi microarray probe

Log2(FC): fold change (base 2 logarithm)

Gene annotation: Putative gene function description

GeneID TSK: Gene code from Trypanosoma cruzi Sequencing Consortium

#: When not available, GenBank sequence ID
