# Supplementary material
Source: PubMed Central journal article supplement (PMC2276385)
Supplement: jbc_M703097200_3.pdf [file jbc_M703097200_3.pdf]

Table 2b. Decreased genes in the transfectant mRNA analysis

| Probe Name    | log2(FC) | Gene annotation                                                                          | GeneID TSK#            |
|---------------|----------|------------------------------------------------------------------------------------------|------------------------|
| MG_R_4_#26    | -2.003   | 5'-3' exonuclease XRND, putative exoribonuclease 2, putative                             | Tc00.1047053507641.80  |
| MG_R_4_#16    | -1.614   | 60S ribosomal protein L44, putative                                                      | Tc00.1047053506815.60  |
| MG_R_17_#40   | -3.072   | 69 kDa paraflagellar rod protein, putative                                               | Tc00.1047053511215.11  |
| Dhr1          | -1.650   | ATP-dependent RNA helicase, putative                                                     | Tc00.1047053511731.5   |
| MG_24H_11_G09 | -1.583   | AY526247   Trypanosoma cruzi putative amino acid transporter PAT6 gene                   | AY526247               |
| IB_MT_08_B11  | -1.920   | clathrin heavy chain, putative                                                           | Tc00.1047053506167.50  |
| CTG_3017      | -1.635   | clathrin heavy chain, putative                                                           | Tc00.1047053506167.50  |
| MG_R_17_#42   | -1.834   | cytochrome b5-like, putative                                                             | Tc00.1047053506753.110 |
| MG_D_AP3_#02  | -1.703   | General sequence without annotation                                                      | NA                     |
| MG_R_4_#66    | -3.022   | Genome fragment without annotated genes                                                  | NA                     |
| CTG_272       | -2.060   | glyceraldehyde 3-phosphate dehydrogenase, putative                                       | Tc00.1047053509065.70  |
| MG_R_Y_#28    | -1.799   | hypothetical protein                                                                     | Tc00.1047053503647.40  |
| MG_R_Y_#08    | -1.689   | hypothetical protein                                                                     | Tc00.1047053503647.40  |
| MG_R_17_#64   | -1.772   | hypothetical protein                                                                     | Tc00.1047053509179.50  |
| MG_R_4_#75    | -1.630   | hypothetical protein                                                                     | Tc00.1047053510173.80  |
| MG_R_Y_#26    | -1.798   | hypothetical protein                                                                     | Tc00.1047053510861.150 |
| MG_R_4_#04    | -1.671   | hypothetical protein, conserved                                                          | Tc00.1047053504109.174 |
| MG_R_Y_#56    | -2.036   | hypothetical protein, conserved                                                          | Tc00.1047053506407.110 |
| CTG_946       | -1.611   | hypothetical protein, conserved                                                          | Tc00.1047053506559.364 |
| MG_D_AP4_#04  | -1.632   | hypothetical protein, conserved                                                          | Tc00.1047053507049.190 |
| MG_R_17_#68   | -2.295   | hypothetical protein, conserved                                                          | Tc00.1047053508039.70  |
| CTG_979       | -1.651   | hypothetical protein, conserved                                                          | Tc00.1047053508199.20  |
| MG_R_Y_#44    | -1.613   | hypothetical protein, conserved                                                          | Tc00.1047053508741.39  |
| CTG_900       | -1.594   | hypothetical protein, conserved                                                          | Tc00.1047053508857.90  |
| CTG_553       | -1.695   | hypothetical protein, conserved                                                          | Tc00.1047053510431.230 |
| MG_R_Y_#41    | -1.787   | hypothetical protein, conserved                                                          | Tc00.1047053511287.64  |
| MG_R_4_#27    | -1.840   | hypothetical protein, conserved                                                          | Tc00.1047053511523.20  |
| MG_24H_10_B02 | -1.848   | TcPUF7                                                                                   | Tc00.1047053511715.100 |
| MG_R_Y_#57    | -2.225   | No similarity to T. cruzi genome                                                         | NA                     |
| MG_R_4_#50    | -2.190   | No similarity to T. cruzi genome                                                         | NA                     |
| MG_R_Y_#46    | -1.741   | serine carboxypeptidase (CBP1), putative serine peptidase, clan SC, family S10, putative | Tc00.1047053508671.20  |
| MG_R_4_#86    | -1.848   | serine/threonine-protein phosphatase 2A, catalytic subunit, putative                     | Tc00.1047053504013.110 |

|              |        |                                                                                                                      |                       |
|--------------|--------|----------------------------------------------------------------------------------------------------------------------|-----------------------|
| CTG_3607     | -1.783 | S-phase kinase-associated protein, putative SKP1 family protein, putative cyclin A/CDK2-associated protein, putative | Tc00.1047053508041.10 |
| MG_R_Y_#59   | -2.909 | Unknown sequence                                                                                                     | NA                    |
| MG_R_Y_#15   | -2.103 | Unknown sequence                                                                                                     | NA                    |
| MG_R_Y_#33   | -2.187 | Unknown sequence                                                                                                     | NA                    |
| MG_D_AP1_#03 | -1.759 | Unknown sequence                                                                                                     | NA                    |
| MG_R_Y_#21   | -1.699 | Unknown sequence                                                                                                     | NA                    |

Probe Name: Internal code for *T. cruzi* microarray probe

Log2(FC): fold change (base 2 logarithm)

Gene annotation: Putative gene function description

GeneID TSK: Gene code from *Trypanosoma cruzi* Sequencing Consortium

#: When not available, GenBank sequence ID

NA: Not available
