# Supplementary material
Source: PubMed Central journal article supplement (PMC2276385)
Supplement: jbc_M703097200_4.pdf [file jbc_M703097200_4.pdf]

TABLE 3. Primers used in RT-PCR and Quantitative PCR assays.

| GeneID TSK# <sup>a</sup> | Primer Forward                          | Primer reverse                      | PCR product |
|--------------------------|-----------------------------------------|-------------------------------------|-------------|
| Tc001047053511215.119    | 5'CGAACGCGAAGAAGCACTC3'                 | 5'ATCTGCTGCTGCACCGTCTTGC<br>C3'     | 350nt       |
| Tc00.1047053508039.70    | 5'AGTATAGCGTTGTTAAGGAAG<br>AAAGC3'      | 5'CCTTCGTGGTGGGCTCGTTA3'            | 148nt       |
| Tc00.1047053506753.110   | 5'ACACGAAGGAAGACGATTTAT<br>GGT3'        | 5'TGTTGCCCGCACTTGTCCCT3'            | 249t        |
| Tc00.1047053504013.110   | 5'TATTGTTCGGGCCCATCAGTGT<br>G3'         | 5'CTTCTTCTTTTAGCCTTCTCTTG<br>TCCC3' | 483nt       |
| Tc00.1047053511523.20    | 5'CAAGTGGCGGTGTGAAGAACG<br>3'           | 5'CCGAGTCGCGAATAGAGTTGG<br>3'       | 180nt       |
| Tc00.1047053507641.80    | 5'GGTAAGATTAACCTGTTTTTGT<br>TGTTGTTTA3' | 5'CCCATCACCGCTACACCGTCTT<br>3'      | 177nt       |
| Tc00.1047053509179.50    | 5'GCGGCGAATTGTAGAAGC3'                  | 5'GAACGGCCAAATCAACTCTG3'            | 393nt       |
| AAS47054                 | 5'GCGCTTGTTATTGGCCTCTTCT<br>TG3'        | 5'AACTGCCTCTCCCTCCCTACAC<br>A3'     | 446nt       |

<sup>a</sup>Gene code from *Trypanosoma cruzi* Sequencing Consortium

#: When not available, GenBank sequence ID
